# Supplementary material for: Argovit™ Silver Nanoparticles Effects on Allium cepa: Plant Growth Promotion without Cyto Genotoxic Damage
Source: PubMed Central journal article supplement (PMC7408422; doi:10.3390/nano10071386), 2020-07-16
Supplement: nanomaterials-10-01386-s001.pdf [file nanomaterials-10-01386-s001.pdf]

## Supplementary Materials

# Argovit™ Silver Nanoparticles Effects on *Allium cepa*: Plant Growth Promotion without Cyto-Genotoxic Damage

Francisco Casillas-Figueroa <sup>1</sup>, María Evarista Arellano-García <sup>2,\*</sup>, Claudia Leyva-Aguilera <sup>2</sup>, Balam Ruíz-Ruíz <sup>3</sup>, Roberto Luna Vázquez-Gómez <sup>1</sup>, Patricia Radilla-Chávez <sup>1</sup>, Rocío Alejandra Chávez-Santoscoy <sup>4</sup>, Alexey Pestryakov <sup>5</sup>, Yanis Toledano-Magaña <sup>1</sup>, Juan Carlos García-Ramos <sup>1,\*</sup> and Nina Bogdanchikova <sup>6</sup>

<sup>1</sup> Escuela de Ciencias de la Salud, UABC, Blvd. Zertuche y Blvd., De los Lagos S/N Fracc, Valle Dorado, 22890 Ensenada, Baja California, Mexico; casillas.francisco@uabc.edu.mx (F.C.-F.); cuentarluna@gmail.com (R.L.V.-G.); patryradilla@uabc.edu.mx (P.R.-C.); yanis.toledano@uabc.edu.mx (Y.T.-M.)

<sup>2</sup> Facultad de Ciencias, UABC, Carretera Transpeninsular Ensenada-Tijuana No. 3917 Col. Playitas, 22860 Ensenada, Baja California, Mexico; cleyva@uabc.edu.mx

<sup>3</sup> Facultad de Medicina extensión los Mochis, Universidad Autónoma de Sinaloa, Av. Ángel Flores s/n, Ciudad Universitaria, 81223 Los Mochis, Sinaloa, Mexico; balamruiz@gmail.com

<sup>4</sup> Centro de Biotecnología-FEMSA, Escuela de Ingeniería y Ciencias, ITESM, Monterrey, Eugenio Garza Sada, 2501 Sur, 64849 Monterrey, Nuevo León, Mexico; chavez.santoscoy@tec.mx

<sup>5</sup> Department of Technology of Organic Substances and Polymer Materials, Tomsk Polytechnic University, 634050 Tomsk, Russia; pestryakov2005@yandex.ru

<sup>6</sup> Centro de Nanociencias y Nanotecnología, UNAM, Carretera Tijuana-Ensenada Km 107, 22860 Ensenada, Baja California, Mexico; [nina@cryn.unam.mx](mailto:nina@cryn.unam.mx)

\* Correspondence: evarista.arellano@uabc.edu.mx (M.E.A.-G.); juan.carlos.garcia.ramos@uabc.edu.mx (J.C.G.-R.); Tel.: +52-64-6174-5925 (ext. 225) (M.E.A.-G.); +52-64-6175-0707 (ext. 65313) (J.C.G.-R.)

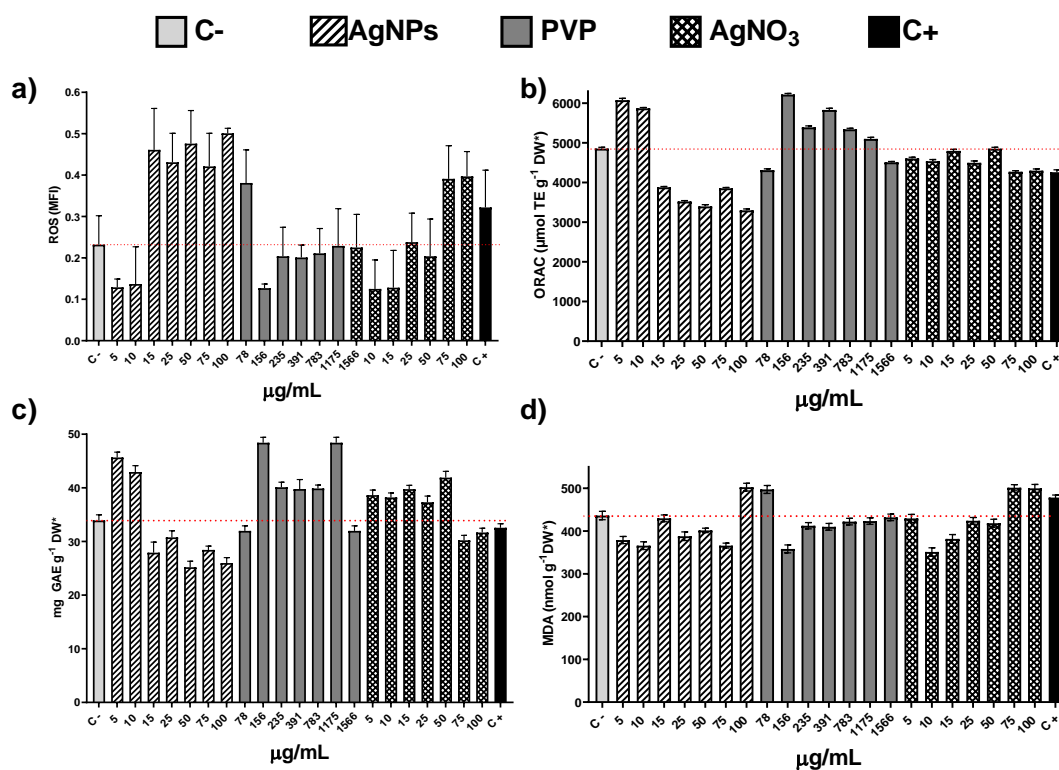

**Figure S1.** Antioxidant response of *Allium cepa* bulbs exposed to different stimulus. (a) Reactive Oxygen Species, (b) Oxygen Radical Absorption Capacity assay, (c) Total Phenolic Content, and (d) Lipoperoxidation recorded on the onion roots after 72h for different concentrations of AgNPs (lined), PVP (dark gray), and AgNO<sub>3</sub> (grid). C- corresponds to untreated plants (light gray) and C+ to those exposed to 0.37 µg/mL of sodium arsenite (black). \* indicates significant differences with the negative control ( $p < 0.05$ ); § indicates significant differences with the positive control ( $p < 0.05$ ).
